# Supplementary material for: Epidemiology of Injuries in Ultimate (Frisbee): A Systematic Review
Source: MDPI journal article supplement (doi:10.3390/sports8120168), 2020-12-21
Supplement: s1 [file s1]

**Table S1.** Full Search String for the MEDLINE Database.

| # | Search String                                                                                                                                                                                                                                                                  |
|---|--------------------------------------------------------------------------------------------------------------------------------------------------------------------------------------------------------------------------------------------------------------------------------|
| 1 | exp "Wounds and Injuries"/                                                                                                                                                                                                                                                     |
| 2 | injur*.mp.                                                                                                                                                                                                                                                                     |
| 3 | wound*.mp.                                                                                                                                                                                                                                                                     |
| 4 | trauma*.mp.                                                                                                                                                                                                                                                                    |
| 5 | 1 or 2 or 3 or 4                                                                                                                                                                                                                                                               |
| 6 | frisbee.mp.                                                                                                                                                                                                                                                                    |
| 7 | (flying and (disc or disk)).mp. [mp=title, abstract, original title, name of substance word, subject heading word, floating sub-heading word, keyword heading word, protocol supplementary concept word, rare disease supplementary concept word, unique identifier, synonyms] |
| 8 | 6 or 7                                                                                                                                                                                                                                                                         |
| 9 | 5 and 8                                                                                                                                                                                                                                                                        |
