# Supplementary material for: Epidemiology of Injuries in Ultimate (Frisbee): A Systematic Review
Source: MDPI journal article supplement (doi:10.3390/sports8120168), 2020-12-21
Supplement: s1 [file s1]

**Table S2.** Quality Assessment of Included Studies Using STROBE Statement Checklist.

| Item                              | Marfleet 1991 | Reynolds and Halsmer 2006 | Yen et al. 2010 | McElveen et al. 2014 | Akinbola et al. 2015 | Swedler et al. 2015 | Kolodziej et al. 2017 | Lazar et al. 2018 | Arthur-Banning et al. 2018 | Hess et al. 2020 | Brezinski et al. 2020 |
|-----------------------------------|---------------|---------------------------|-----------------|----------------------|----------------------|---------------------|-----------------------|-------------------|----------------------------|------------------|-----------------------|
| <b>Title and abstract</b>         | ✓             | ✓                         | ✓               | ✓                    | ✓                    | ✓                   | ✓                     | ✓                 | ✓                          | ✓                | ✓                     |
| <b>Introduction</b>               |               |                           |                 |                      |                      |                     |                       |                   |                            |                  |                       |
| Background/rationale              | ✓             | ✓                         | ✓               | ✓                    | ✓                    | ✓                   | ✓                     | ✓                 | ✓                          | ✓                | ✓                     |
| Objectives                        | ✓             | ✓                         | ✓               | ✓                    | ✓                    | ✓                   | ✓                     | ✓                 | ✓                          | ✓                | ✓                     |
| <b>Methods</b>                    |               |                           |                 |                      |                      |                     |                       |                   |                            |                  |                       |
| Study design                      | –             | ✓                         | ✓               | ✓                    | ✓                    | ✓                   | ✓                     | ✓                 | ✓                          | ✓                | ✓                     |
| Setting                           | ✓             | ✓                         | ✓               | ✓                    | ✓                    | ✓                   | ✓                     | ✓                 | ✓                          | ✓                | ✓                     |
| Participants                      | ✓             | ✓                         | ✓               | ✓                    | ✓                    | ✓                   | ✓                     | ✓                 | ✓                          | ✓                | ✓                     |
| Variables                         | –             | ✓                         | ✓               | –                    | ✓                    | ✓                   | ✓                     | ✓                 | ✓                          | ✓                | ✓                     |
| Data sources/measurement          | ✓             | ✓                         | ✓               | –                    | ✓                    | ✓                   | –                     | ✓                 | ✓                          | ✓                | ✓                     |
| Bias                              | –             | –                         | –               | –                    | –                    | ✓                   | –                     | –                 | –                          | ✓                | –                     |
| Study size                        | ✓             | ✓                         | ✓               | –                    | –                    | ✓                   | ✓                     | ✓                 | –                          | ✓                | ✓                     |
| Quantitative variables            | ✓             | –                         | –               | –                    | –                    | ✓                   | ✓                     | –                 | ✓                          | ✓                | ✓                     |
| Statistical methods               | –             | ✓                         | ✓               | ✓                    | ✓                    | ✓                   | ✓                     | ✓                 | –                          | ✓                | ✓                     |
| <b>Results</b>                    |               |                           |                 |                      |                      |                     |                       |                   |                            |                  |                       |
| Participants                      | ✓             | ✓                         | ✓               | –                    | ✓                    | ✓                   | ✓                     | ✓                 | –                          | –                | –                     |
| Descriptive data                  | ✓             | –                         | ✓               | –                    | ✓                    | ✓                   | ✓                     | ✓                 | –                          | ✓                | ✓                     |
| Outcome data                      | ✓             | ✓                         | ✓               | ✓                    | ✓                    | ✓                   | ✓                     | ✓                 | ✓                          | ✓                | ✓                     |
| Main results                      | ✓             | ✓                         | ✓               | ✓                    | ✓                    | ✓                   | ✓                     | ✓                 | ✓                          | ✓                | ✓                     |
| Other analysis                    | –             | –                         | –               | –                    | –                    | –                   | –                     | ✓                 | –                          | ✓                | –                     |
| <b>Discussion</b>                 |               |                           |                 |                      |                      |                     |                       |                   |                            |                  |                       |
| Key results                       | ✓             | ✓                         | ✓               | ✓                    | ✓                    | ✓                   | ✓                     | ✓                 | ✓                          | ✓                | ✓                     |
| Limitations                       | –             | ✓                         | ✓               | –                    | ✓                    | ✓                   | –                     | ✓                 | ✓                          | ✓                | ✓                     |
| Interpretation                    | ✓             | ✓                         | ✓               | ✓                    | ✓                    | ✓                   | ✓                     | ✓                 | ✓                          | ✓                | ✓                     |
| Generalisability                  | –             | –                         | –               | –                    | ✓                    | –                   | –                     | –                 | –                          | ✓                | ✓                     |
| <b>Other information</b>          |               |                           |                 |                      |                      |                     |                       |                   |                            |                  |                       |
| Funding                           | –             | –                         | ✓               | –                    | –                    | –                   | –                     | –                 | –                          | –                | –                     |
| <b>Percentage fulfilled items</b> | 64            | 73                        | 82              | 50                   | 77                   | 86                  | 73                    | 82                | 64                         | 91               | 82                    |
