# Supplementary material for: Epidemiology of Injuries in Ultimate (Frisbee): A Systematic Review
Source: MDPI journal article supplement (doi:10.3390/sports8120168), 2020-12-21
Supplement: s1 [file s1]

**Figure S1.** Graphical Overview for Evidence Reviews (GOfER) diagram.

| Study                         | Country                                       | Setting                                                        | Design               | Quality  | Sample Size | Sex | Injuries | Body Region                                        | Injury Type                                                                  | Injury Mechanism |
|-------------------------------|-----------------------------------------------|----------------------------------------------------------------|----------------------|----------|-------------|-----|----------|----------------------------------------------------|------------------------------------------------------------------------------|------------------|
| Marfleet 1991                 | Belgium<br>Denmark<br>Germany<br>Norway<br>UK | World championship<br>(Competition)                            | Prospective cohort   | Moderate | N=1000      | NR  | n=485    | Head and neck<br>Upper limb<br>Trunk<br>Lower limb | Muscle/Tendon<br>Ligament/Joint capsule<br>Superficial tissues/Skin<br>Other | NR               |
| Reynolds and<br>Halsmer 2006  | USA                                           | Regional tournament<br>(Competition)                           | Cross-sectional      | Good     | N=135       | F M | NR       | NR                                                 | NR                                                                           | NR               |
| Yen et al. 2010               | USA                                           | College championship<br>(Competition)                          | Prospective cohort   | Good     | N=705       | F M | n=107    | Head and neck<br>Upper limb<br>Trunk<br>Lower limb | Non-contact<br>Indirect contact<br>Direct contact                            |                  |
| McElveen et al.<br>2014       | USA                                           | College league<br>(Competition)                                | Prospective cohort   | Poor     | N=553       | NR  | n=6      | NR                                                 | NR                                                                           | NR               |
| Akinbola et al.<br>2015       | USA                                           | University sport clubs<br>(Competition and<br>training)        | Prospective cohort   | Moderate | N=97        | NR  | n=143    | Head and neck<br>Upper limb<br>Trunk<br>Lower limb | NR                                                                           | NR               |
| Swedler et al.<br>2015        | USA                                           | College series<br>(Competition and<br>training)                | Prospective cohort   | Good     | NR          | F M | n=1317   | Head and neck<br>Upper limb<br>Trunk<br>Lower limb | Non-contact<br>Indirect contact<br>Direct contact                            |                  |
| Kolodziej et al.<br>2017      | Poland                                        | Local club sports<br>(Competition and<br>training)             | Cross-sectional      | Good     | N=110       | F M | n=408    | Head and neck<br>Upper limb<br>Trunk<br>Lower limb | NR                                                                           |                  |
| Lazar et al. 2018             | USA                                           | National teams and<br>leagues<br>(Competition and<br>training) | Cross-sectional      | Good     | N=787       | F M | n=338    | Head and neck                                      | Non-contact<br>Indirect contact<br>Direct contact                            |                  |
| Arthur-Banning et al.<br>2018 | USA                                           | University club sports<br>(Competition and<br>training)        | Retrospective cohort | Moderate | NR          | NR  | NR       | NR                                                 | NR                                                                           | NR               |
| Hess et al. 2020              | USA<br>Canada                                 | National league<br>(Competition and<br>training)               | Prospective cohort   | Good     | NR          | F M | n=299    | Head and neck<br>Upper limb<br>Trunk<br>Lower limb | Non-contact<br>Indirect contact<br>Direct contact                            |                  |
| Brezinki et al. 2020          | USA                                           | University club sports<br>(Competition and<br>training)        | Prospective cohort   | Good     | N=69        | F M | n=18     | NR                                                 | NR                                                                           | NR               |

Abbreviations: USA, United States of America; UK, United Kingdom; F, Female; M, Male; NR, Not reported
