# Supplementary material for: Epidemiology of Injuries in Ultimate (Frisbee): A Systematic Review
Source: Sports (Basel). 2020 Dec 21;8(12):168. doi: 10.3390/sports8120168 (PMC7767421; doi:10.3390/sports8120168)
Supplement: Supplementary file 1 [file sports-08-00168-s001.zip]

Archive with 4 entries (4 files):
- Supplementary Material - Figure S1.pdf
- Supplementary Material - Table S1.pdf
- Supplementary Material - Table S2.pdf
- Supplementary Material - Video S1.mp4
